# Supplementary material
Source: publisher site journal article supplement (https://www.dovepress.com/article/461668)
Supplement: Supplementary file 1 [file get_supplementary_file.php]

Fig. S1. Pathway diagram of KEGG enrichment analysis. A. Mitophagy -- animal pathway diagram display. B. Autophagy -- animal pathway diagram display. C. Pathways of neuroolume-multiple diseases. D. Diagram of Shigellosis pathway. KEGG: Kyoto Encyclopedia of Genes and Genomes.

## Table S1. GEO Microarray Chip Information

|  | GSE124272 | GSE150408 |
| --- | --- | --- |
| Platform | GPL21185 | GPL21185 |
| Species | Homo sapiens | Homo sapiens |
| Tissue | whole blood | whole blood |
| Samples in Normal group | 8 | 17 |
| Samples in IDD group | 8 | 17 |

GEO：Gene Expression Omnibus

## Table S2. Primers of qPCR gene

| Gene | Forward Primer (5' → 3') | Reverse Primer (5' → 3') |
| --- | --- | --- |
| ULK1 | CGCCAACCCCAACAGCATCC | TCCGCCTTCCCGTCGTAGTG |
| ATG-5 | ATCCCACAGCCAACAGATTGAAGG | TGCCTCCACCAAACCTGATTGAAG |
| SQSTM1 | GTACCAGGACAGCGAGAGGAAGG | CGCAGACACCGAGGAGATGAGG |
| SLC25A4 | GGTGTGGATCGGCATAAGCAGTTC | CCAGCGGGTAGACAAAGCAAAGG |
| RPS27A | CCCGCTTCCGCAGATTTCACC | GGGCAGAGAATCAGCAATCTACCAG |
| PHB2 | CTTCTTCAATCGGATCGGTGGAGTG | TGTAGGTCTTTGGAGCCTGTAGGG |
| ATG-7 | GAGCAAGCCCGCAGAGATGTG | TCCCAAAGCAGCATTGATGACCAG |
| OPTN | GTCTCCACTGGCACGGCATTG | TCTCTCCACCTTCTGATTCCCTTCC |
| GAPDH | CCAGCAAGAGCACAAGAGGAAGAG | GGTCTACATGGCAACTGTGAGGAG |

## Table S3. GO enrichment analysis results of hub genes

| ONTOLOGY | ID | Description | GeneRatio | BgRatio | pvalue | p.adjust | qvalue |
| --- | --- | --- | --- | --- | --- | --- | --- |
| BP | GO:0016236 | macroautophagy | 8/12 | 295/18670 | 1.65652E-12 | 1.03036E-09 | 5.61473E-10 |
| BP | GO:0006914 | autophagy | 8/12 | 496/18670 | 1.05797E-10 | 2.19353E-08 | 1.19532E-08 |
| BP | GO:0061919 | process utilizing autophagic mechanism | 8/12 | 496/18670 | 1.05797E-10 | 2.19353E-08 | 1.19532E-08 |
| BP | GO:0000422 | autophagy of mitochondrion | 5/12 | 76/18670 | 7.57439E-10 | 9.42254E-08 | 5.13464E-08 |
| CC | GO:0005741 | mitochondrial outer membrane | 6/12 | 178/19717 | 4.3948E-10 | 2.68593E-08 | 1.15817E-08 |
| CC | GO:0031968 | organelle outer membrane | 6/12 | 201/19717 | 9.14621E-10 | 2.68593E-08 | 1.15817E-08 |
| CC | GO:0019867 | outer membrane | 6/12 | 203/19717 | 9.70818E-10 | 2.68593E-08 | 1.15817E-08 |
| CC | GO:0000407 | phagophore assembly site | 4/12 | 32/19717 | 2.80191E-09 | 5.81397E-08 | 2.50698E-08 |
| MF | GO:0070530 | K63-linked polyubiquitin modification-dependent protein binding | 2/11 | 21/17697 | 7.3289E-05 | 0.004617207 | 0.001774365 |
| MF | GO:0031593 | polyubiquitin modification-dependent protein binding | 2/11 | 51/17697 | 0.000440465 | 0.01387464 | 0.005331942 |
| MF | GO:0140030 | modification-dependent protein binding | 2/11 | 144/17697 | 0.003446454 | 0.049636404 | 0.019074976 |
| MF | GO:0017137 | Rab GTPase binding | 2/11 | 175/17697 | 0.005043081 | 0.049636404 | 0.019074976 |

GO：Gene Ontology ; BP：biological process; CC：cellular component; MF：molecular function

## Table S4. KEGG enrichment analysis results of hub genes

| ONTOLOGY | ID | Description | GeneRatio | BgRatio | pvalue | p.adjust | qvalue |
| --- | --- | --- | --- | --- | --- | --- | --- |
| KEGG | hsa04137 | Mitophagy - animal | 6/8 | 68/8076 | 7.86339E-12 | 2.43765E-10 | 1.40713E-10 |
| KEGG | hsa04140 | Autophagy - animal | 5/8 | 137/8076 | 7.02134E-08 | 1.08831E-06 | 6.28225E-07 |
| KEGG | hsa05022 | Pathways of neurodegeneration - multiple diseases | 5/8 | 475/8076 | 3.32904E-05 | 0.000344001 | 0.000198574 |
| KEGG | hsa05131 | Shigellosis | 4/8 | 246/8076 | 5.34096E-05 | 0.000413925 | 0.000238938 |
| KEGG | hsa04136 | Autophagy - other | 2/8 | 32/8076 | 0.000419635 | 0.002601737 | 0.001501851 |
| KEGG | hsa04216 | Ferroptosis | 2/8 | 41/8076 | 0.000690661 | 0.003568415 | 0.002059866 |
| KEGG | hsa04211 | Longevity regulating pathway | 2/8 | 89/8076 | 0.003220654 | 0.014262895 | 0.00823325 |
| KEGG | hsa05014 | Amyotrophic lateral sclerosis | 3/8 | 364/8076 | 0.004292776 | 0.016634507 | 0.009602262 |
| KEGG | hsa05017 | Spinocerebellar ataxia | 2/8 | 143/8076 | 0.008128956 | 0.027999737 | 0.016162836 |
| KEGG | hsa04218 | Cellular senescence | 2/8 | 156/8076 | 0.009617378 | 0.028117391 | 0.016230752 |
| KEGG | hsa04217 | Necroptosis | 2/8 | 159/8076 | 0.009977139 | 0.028117391 | 0.016230752 |

KEGG：Kyoto Encyclopedia of Genes and Genomes
